# Supplementary material
Source: PubMed Central journal article supplement (PMC3716085)
Supplement: JCM.02654-12_zjm999092561so1.pdf [file JCM.02654-12_zjm999092561so1.pdf]

**Table S1. Gram-positive cocci tested in the retrospective study.**

| <b>Organism<sup>a</sup></b>                                  | <b>Number of isolates</b> |
|--------------------------------------------------------------|---------------------------|
| <i>Abiotrophia defectiva</i>                                 | 1                         |
| <i>Aerococcus sanguinicola</i>                               | 5                         |
| <i>Aerococcus urinae</i>                                     | 9                         |
| <i>Aerococcus viridans</i>                                   | 3                         |
| <i>Enterococcus avium</i>                                    | 1                         |
| <i>Enterococcus durans</i>                                   | 1                         |
| <i>Enterococcus faecalis</i>                                 | 2                         |
| <i>Enterococcus faecium</i>                                  | 8                         |
| <i>Enterococcus gallinarum</i>                               | 4                         |
| <i>Gemella haemolysans</i>                                   | 3                         |
| <i>Gemella sanguinis</i>                                     | 2                         |
| <i>Granulicatella adiacens</i>                               | 4                         |
| <i>Kocuria kristinae</i>                                     | 2                         |
| <i>Lactococcus lactis</i>                                    | 1                         |
| <i>Leuconostoc lactis</i>                                    | 1                         |
| <i>Rothia mucilaginosa</i>                                   | 2                         |
| <i>Staphylococcus aureus</i>                                 | 6                         |
| <i>Staphylococcus auricularis</i>                            | 2                         |
| <i>Staphylococcus cohnii</i>                                 | 3                         |
| <i>Staphylococcus condimentii</i>                            | 1                         |
| <i>Staphylococcus epidermidis</i>                            | 5                         |
| <i>Staphylococcus haemolyticus</i>                           | 2                         |
| <i>Staphylococcus hominis</i>                                | 5                         |
| <i>Staphylococcus lugdunensis</i>                            | 4                         |
| <i>Staphylococcus saprophyticus</i>                          | 2                         |
| <i>Staphylococcus schleiferi</i>                             | 2                         |
| <i>Streptococcus agalactiae</i>                              | 3                         |
| <i>Streptococcus anginosus</i>                               | 6                         |
| <i>Streptococcus canis</i>                                   | 2                         |
| <i>Streptococcus constellatus</i>                            | 2                         |
| <i>Streptococcus dysgalactiae</i> subsp. <i>equisimilis</i>  | 2                         |
| <i>Streptococcus gallolyticus</i> subsp. <i>gallolyticus</i> | 4                         |
| <i>Streptococcus gallolyticus</i> subsp. <i>pasteurianus</i> | 3                         |
| <i>Streptococcus gordonii</i>                                | 4                         |
| <i>Streptococcus infantarius</i>                             | 3                         |
| <i>Streptococcus intermedius</i>                             | 3                         |
| <i>Streptococcus mitis</i>                                   | 5                         |
| <i>Streptococcus mutans</i>                                  | 10                        |
| <i>Streptococcus oralis</i>                                  | 3                         |
| <i>Streptococcus pneumoniae</i>                              | 8                         |
| <i>Streptococcus pyogenes</i>                                | 4                         |
| <i>Streptococcus salivarius</i>                              | 4                         |
| <i>Streptococcus sanguinis</i>                               | 6                         |
| <i>Streptococcus thermophilus</i>                            | 1                         |
| <i>Streptococcus vestibularis</i>                            | 2                         |
| <b>TOTAL</b>                                                 | <b>156</b>                |

<sup>a</sup> Species identification as determined by conventional methods and 16S rRNA gene analysis.
